# Supplementary material
Source: Springer Nature journal article supplement (https://www.springermedizin.de/resource/supplementary/12886_2011_256_MOESM4_ESM.pdf/9473682)

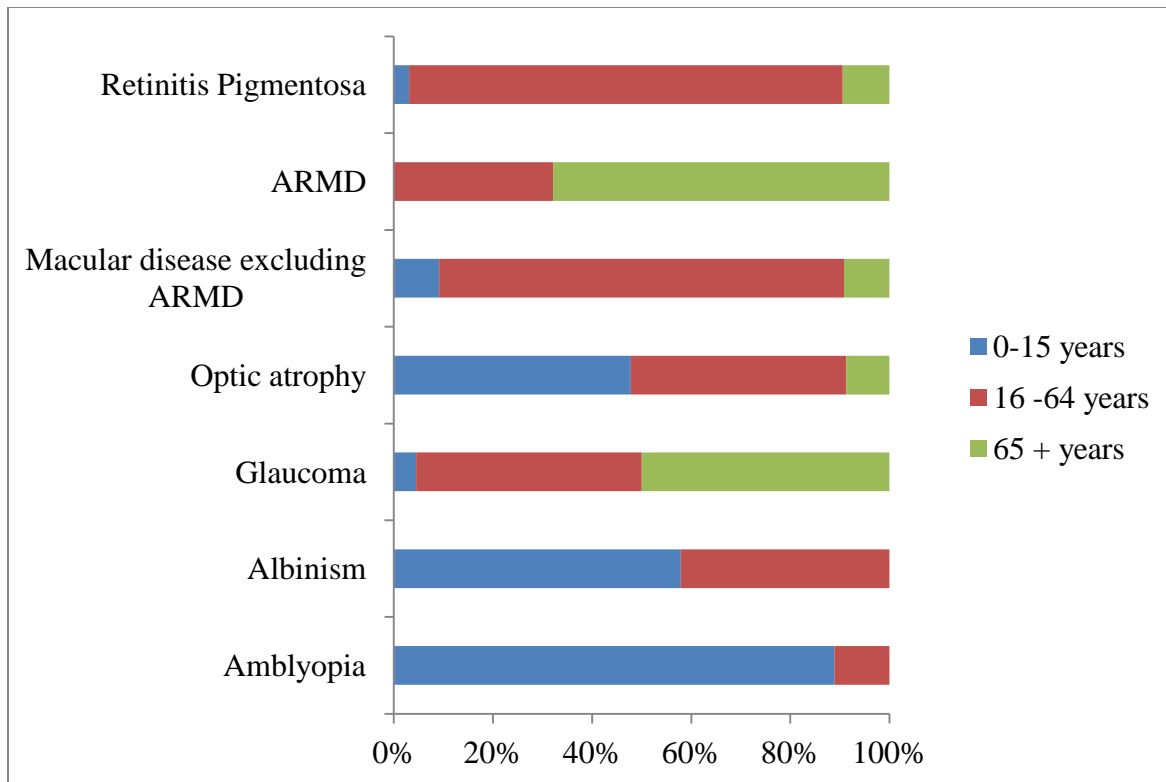

Supplement: MOESM4 [file 9473682]
